# Supplementary material for: Fabrication and characterization of flexible films of poly(vinylidene fluoride)/Pb(Fe0.5Ti0.5)O3−δ multi-ferroic nano-composite
Source: Royal Society of Chemistry journal article supplement (doi:10.1039/c6ra01306f), 2016-01-01
Supplement: c6ra01306f1.pdf [file c6ra01306f1.pdf]

### Supplementary Information

Fourier Transform Infrared Spectroscopy was used to investigate the phase transformation in PVDF samples. The supplementary Figure 1 shows the FTIR spectra of pure PVDF and PVDF/PTFO nanocomposite samples of 5 wt% PTFO and 10 wt% PTFO. The characteristic peaks at 530, 618, 764 and 813  $\text{cm}^{-1}$  is a clear indication that pure PVDF as well as PVDF/PTFO nanocomposites crystallize predominantly in the  $\alpha$ -phase. It is also observed that the addition of PTFO tends to increase the intensity of the peaks corresponding to the  $\alpha$ -phase.

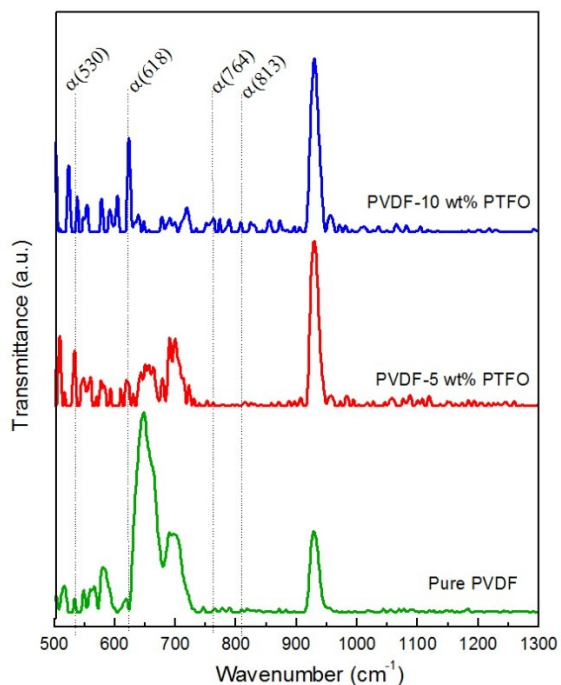

**Supplementary Figure 1: FTIR analysis of pure PVDF and PVDF/PTFO nanocomposite film prepared via compression molding technique.**

**Supplementary Table 1: The influence of PTFO nanoparticles on PVDF matrix on the various investigated for PVDF/PTFO nanocomposite**

| Parameters                          | PVDF/PTFO Nanocomposites |          |          |          |
|-------------------------------------|--------------------------|----------|----------|----------|
|                                     | 0 wt%                    | 5 wt%    | 10 wt%   | 25 wt%   |
| $\epsilon'$ (1kHz)                  | 9.7                      | 9.8      | 9.7      | 12       |
| Tan $\delta$ (1kHz)                 | 0.0153                   | 0.01182  | 0.01181  | 0.01098  |
| $M_s$ [(at 15 kOe) emu/g]           | -                        | 0.03     | 0.04     | 0.2      |
| $M_r$ (emu/g)                       | -                        | 0.01     | 0.02     | 0.08     |
| $H_c$ (kOe)                         | -                        | 2.83     | 3.16     | 2.68     |
| $P_m$ ( $\mu\text{C}/\text{cm}^2$ ) | 0.03                     | 0.04     | 0.07     | 0.1      |
| $P_r$ ( $\mu\text{C}/\text{cm}^2$ ) | 0.01                     | 0.02     | 0.023    | 0.026    |
| $H_c$ (Kv/cm)                       | 3.26                     | 16.12    | 17.9     | 21.22    |
| MD %                                | -                        | 0.24     | 0.26     | 0.3      |
| $\sigma_{dc}$ (S/cm)                | 6.07E-12                 | 6.03E-12 | 6.28E-12 | 7.68E-12 |
| $\eta$                              | 0.96904                  | 0.97069  | 0.97023  | 0.96983  |

**Supplementary Table 2: Summary of the various experimental results for pure PVDF and PVDF/PTFO nanocomposite of 25 wt% PTFO nanoparticles investigated in this work along with the relevant reported results available in the literature.**

| Nanocomposite site films      | PVDF/ PTFO (this work) |                     | Ba <sub>0.95</sub> Ca <sub>0.05</sub> Zr <sub>0.15</sub> Ti <sub>0.85</sub> O <sub>3</sub> /PVDF (36) |              |                         | BaTiO <sub>3</sub> : PVDF (37) | BaTiO <sub>3</sub> /PVDF (38) | PVAc/BiFeO <sub>3</sub> (22) | BiFeO <sub>3</sub> / PVDF (19)      | PVD F/BiFeO <sub>3</sub> (20) | BiFeO <sub>3</sub> /PMM A (21) | BiFeO <sub>3</sub> /PVA (23) | Fe <sub>3</sub> O <sub>4</sub> / PVDF (39) | PVDF-GO-Fe <sub>3</sub> O <sub>4</sub> (40)  | Ni /PVDF (41) |
|-------------------------------|------------------------|---------------------|-------------------------------------------------------------------------------------------------------|--------------|-------------------------|--------------------------------|-------------------------------|------------------------------|-------------------------------------|-------------------------------|--------------------------------|------------------------------|--------------------------------------------|----------------------------------------------|---------------|
| Preparation method            | Hot molding            |                     | Solution Casting                                                                                      |              |                         | Hot roll                       | Hot press                     | Soln. Cast.                  | Hot pres                            | Hot mold                      | Soln. Cast.                    | Soln. Cast.                  | Solv. Cast.                                | Solv. Cast.                                  | Solv. Cast.   |
| Filler content                | 0 wt%                  | 25 wt%              | neat PVDF                                                                                             | 22 vol% BCZT | 22 vol% dopamine @ BCZT | 80 vol% BaTiO <sub>3</sub>     | 80%                           | 2wt% PureBi FeO <sub>3</sub> | 50 wt% BiFeO <sub>3</sub>           | 22 vol%                       | 10 vol%                        | BiFeO <sub>3</sub> /PV; 1/16 | 9.09% Fe <sub>3</sub> O <sub>4</sub>       | 5wt% GO, 5wt% Fe <sub>2</sub> O <sub>3</sub> |               |
| ε' (1kHz)                     | 9.7                    | 12                  | ~4                                                                                                    | ~7           | ~9.5                    | -                              | 70                            | ~7.5                         | -                                   | 500                           | ~8.5                           | -                            | -                                          | ~7.5                                         | -             |
| tanδ (1kHz)                   | 0.015                  | 0.0109              | ~0.06                                                                                                 | ~0.06        | ~0.07                   | -                              | ~0.05                         | ~2.2                         | -                                   | ~0.2                          | ~0.05                          | -                            | -                                          | ~0.1                                         | -             |
| Ms [(@ 15 kOe) emu/g          | -                      | 0.2                 | -                                                                                                     | -            | -                       | -                              | -                             | M <sub>max</sub> ~0.4*       | M <sub>max</sub> ~0.02 <sup>#</sup> | -                             | ~0.6* emu/cc                   | ~0.5                         | ~3.8                                       | ~2.2                                         | ~2.2          |
| Mr (emu/g) <sup>Δ</sup>       | -                      | 0.08                | -                                                                                                     | -            | -                       | -                              | -                             | -                            | ~3.0 × 10 <sup>-3</sup>             | -                             | -                              | -                            | -                                          | -                                            | -             |
| Hc (kOe) <sup>Δ</sup>         | -                      | 2.6                 | -                                                                                                     | -            | -                       | -                              | -                             | -                            | ~1.2                                | -                             | -                              | -                            | -                                          | -                                            | -             |
| Pm (μC/cm <sup>2</sup> )      | 0.03                   | 0.1                 | -                                                                                                     | -            | -                       | 0.51@ 67.6 kV/cm               | ~0.8 @ 60 kV/cm               | ~4.5 at 20kV/cm              | -                                   | ~60                           | -                              | ~0.04x10 <sup>-3</sup>       | ~0.04 @100 kV/cm                           | ~0.05 at60 kV/cm                             | ~0.1          |
| Pr (μC/cm <sup>2</sup> )      | 0.01                   | 0.026               | -                                                                                                     | -            | -                       | 0.15                           | ~0.2                          | ~3                           | -                                   | ~20                           | -                              | ~0.02x10 <sup>-3</sup>       | ~0.02                                      | ~0.02                                        | -             |
| Hc (kV/cm)                    | 3.26                   | 21.22               | -                                                                                                     | -            | -                       | 19.2                           | ~15kV/cm                      | ~15KV/cm                     | -                                   | ~200                          | -                              | 0.2kV/cm                     | ~50kV/cm                                   | ~22kV/cm                                     | -             |
| MD % @9kOe                    | -                      | 0.3                 | -                                                                                                     | -            | -                       | -                              | -                             | <0.10                        | -                                   | -                             | -                              | -                            | ~0.1                                       | ~0.02                                        | ~0.005        |
| σ <sub>AC</sub> (S/cm) @ 1kHz | ~5x10 <sup>-9</sup>    | ~7x10 <sup>-9</sup> | -                                                                                                     | -            | -                       | -                              | -                             | -                            | -                                   | ~2x10 <sup>-8</sup>           | ~2x10 <sup>-10</sup>           | -                            | -                                          | -                                            | -             |

\*samples were superparamagnetic.

# samples showed no saturation.

Δ Mr and Hc being so small that it can't be extracted from reported plots.
